# Supplementary material
Source: Springer Nature journal article supplement (https://www.springermedizin.de/resource/supplementary/13229_2013_160_MOESM1_ESM.pdf/9676214)
Supplement: MOESM1 [file 9676214]

**Additional File 1 - Overview of the samples used in this study.**

| <b>Sample</b> | <b>Sire / Family</b> | <b>Father Group</b> | <b>RIN</b> |
|---------------|----------------------|---------------------|------------|
| 1             | Y1                   | Young               | 8.4        |
| 2             | O1                   | Old                 | 8.4        |
| 3             | Y1                   | Young               | 8.5        |
| 4             | O2                   | Old                 | 8.4        |
| 5             | Y1                   | Young               | 8.5        |
| 6             | O2                   | Old                 | 8.6        |
| 7             | Y2                   | Young               | 8.2        |
| 8             | O3                   | Old                 | 8.4        |
| 9             | Y3                   | Young               | 8.2        |
| 10            | O3                   | Old                 | 8.5        |
| 11            | Y3                   | Young               | 8.6        |
| 12            | O4                   | Old                 | 8.9        |
| 13            | Y3                   | Young               | 8.2        |
| 14            | Y3                   | Young               | 8.6        |
| 15            | Y4                   | Young               | 8.5        |
| 16            | O5                   | Old                 | 8.5        |
| 17            | Y4                   | Young               | 8.6        |
| 18            | O5                   | Old                 | 8.6        |
| 19            | Y4                   | Young               | 8.6        |
| 20            | O6                   | Old                 | 6.1        |
| 21            | Y4                   | Young               | 8.7        |
| 22            | Y1                   | Young               | 8.3        |
| 23            | O1                   | Old                 | 8.5        |
| 24            | Y2                   | Young               | 8.4        |
| 25            | O1                   | Old                 | 8.6        |
| 26            | Y3                   | Young               | 8.9        |
| 27            | O2                   | Old                 | N/A        |
| 28            | Y4                   | Young               | 8.9        |
| 29            | O4                   | Old                 | 8.5        |
| 30            | O4                   | Old                 | N/A        |
| 31            | O5                   | Old                 | 8          |
| 32            | O6                   | Old                 | N/A        |
